# Supplementary material for: A highly pathogenic porcine reproductive and respiratory syndrome virus candidate vaccine based on Japanese encephalitis virus replicon system
Source: PeerJ. 2017 Jul 20;5:e3514. doi: 10.7717/peerj.3514 (PMC5522605; doi:10.7717/peerj.3514)
Supplement: Supplemental Information 2 — Specific antibodies elicited by recombinant JEV replicons expressing GP5/M protein in mice. Eight-week-old, SPF BALB/c mice were immunized with pJEV-REP-G-2A-M-IRES, pJEV-REP-G-2A-M, pCAGGS-GM, pJEV-REP-IRES, and PBS respectively. Mice sera were collected at indicated time points after immunization and used to detect the GP5 and M specific antibodies by ELISA. [file peerj-05-3514-s002.xlsx]

## Sheet: Sheet1
Treatment	Absorbance values at 630 nm (week of post-immunizaion)
	Zero			2 weeks			4 weeks			6 weeks			8 weeks			10 weeks
pJEV-REP-G-2A-M-IRES	0.063	0.051	0.067	0.198	0.162	0.102	0.306	0.1747	0.143	0.601	0.337	0.416	0.533	0.8394	0.744	0.507	0.773	0.616
pJEV-REP-G-2A-M	0.059	0.067	0.073	0.168	0.117	0.132	0.137	0.283	0.168	0.526	0.393	0.632	0.757	0.885	0.558	0.743	0.629	0.486
pCAGGS-GM	0.048	0.051	0.054	0.092	0.084	0.132	0.153	0.217	0.102	0.402	0.602	0.247	0.586	0.737	0.433	0.608	0.442	0.307
pJEV-REP-IRES	0.056	0.048	0.061	0.086	0.068	0.042	0.124	0.132	0.076	0.162	0.054	0.116	0.238	0.117	0.094	0.119	0.213	0.106
PBS	0.044	0.066	0.057	0.057	0.079	0.032	0.13	0.119	0.044	0.125	0.136	0.042	0.202	0.113	0.142	0.138	0.112	0.205
